# Supplementary material
Source: PubMed Central journal article supplement (PMC8035297)
Supplement: NIHMS1680868-supplement-1.pdf [file NIHMS1680868-supplement-1.pdf]

**Supplementary Table 1: ATC, ICD, SNOMED, and topography codes used for identification of study populations\***

Journal Pre-proof

|                                       | TOPOGRAPHY                                                                                  | SNOMED                                                                                             | ICD9 <sup>¶</sup> | ICD10           | ATC     |
|---------------------------------------|---------------------------------------------------------------------------------------------|----------------------------------------------------------------------------------------------------|-------------------|-----------------|---------|
| Antibiotics                           |                                                                                             |                                                                                                    |                   |                 | J01     |
| Crohn's disease                       |                                                                                             |                                                                                                    | 555               | K50             |         |
| Celiac disease                        | T64x, T65x (excluding T652, T65200, T653, T65300, T654, T656, T65600, T65620, T6592, T6593) | M58, M5800, M58000, M58001, M58005, M58006, M58007, M58000X, D6218, D62180, D6218X, D6218Y, D62188 |                   |                 |         |
| Inflammatory bowel disease            |                                                                                             |                                                                                                    | 556, 555          | K50, K51, K52.3 |         |
| Microscopic colitis                   | T67x, T68x                                                                                  | M40600x, M47170x                                                                                   |                   |                 |         |
| Non-steroidal anti-inflammatory drugs |                                                                                             |                                                                                                    |                   |                 | M01A    |
| Proton pump inhibitors                |                                                                                             |                                                                                                    |                   |                 | A02BC   |
| Serotonin Reuptake Inhibitors         |                                                                                             |                                                                                                    |                   |                 | N06AB   |
| Statins                               |                                                                                             |                                                                                                    |                   |                 | C10AA   |
| Steroids (budesonide)                 |                                                                                             |                                                                                                    |                   |                 | A07EA06 |
| Ulcerative colitis                    |                                                                                             |                                                                                                    | 556               | K51             |         |

\*Abbreviation: Anatomical therapeutic chemical classification (ATC), International classification of disease (ICD), Systematized Nomenclature of Medicine (SNOMED). ¶ ICD9 started in 1987. Since the first patients with microscopic colitis was included in 1990, all study participants had ≥3 years of exposure in the Patient Register prior to identification of comorbidities.

**Supplementary Table 2: Definition of types of gastrointestinal infection using ICD coding**

| Type of gastroenteritis                          | Infectious agent                  | ICD-7                | ICD-8                                 | ICD-9                    | ICD-10                   |
|--------------------------------------------------|-----------------------------------|----------------------|---------------------------------------|--------------------------|--------------------------|
| <b>Infectious diseases of the GI tract</b>       | Any                               | 040-049              | 000-009                               | 001-009                  | A00-A09                  |
| <b>Bacterial infections</b>                      | Typhoid/Paratyphoid               | 040-041              | 001-002                               | 002                      | A01                      |
|                                                  | <i>Salmonella</i>                 | 042                  | 003                                   | 003                      | A02                      |
|                                                  | <i>Shigella</i>                   | 045                  | 004                                   | 004                      | A03                      |
|                                                  | <i>Escherichia coli</i>           | -                    | 008,0                                 | 008A                     | A04.0-A04.4              |
|                                                  | <i>Campylobacter</i>              | -                    | -                                     | 008E                     | A04.5                    |
|                                                  | <i>Yersinia Enterocolitica</i>    | -                    | -                                     | 008E                     | A04.6                    |
|                                                  | <i>Clostridium difficile</i>      | -                    | -                                     | 008E                     | A04.7                    |
|                                                  | Other bacterial infection         | -                    | 008,2-008,3                           | 008F                     | A04 (except A04.0-A04.7) |
|                                                  | Bacterial food poisoning          | 049                  | 005                                   | 005                      | A05                      |
| <b>Parasitic infections</b>                      | Amoeba                            | 046                  | 006                                   | 006                      | A06                      |
|                                                  | Giardia                           | 047,02               | 007,10                                | 007B                     | A07.1                    |
|                                                  | Cryptosporidium                   | -                    | -                                     | -                        | A07.2                    |
|                                                  | Isospora                          | -                    | -                                     | -                        | A07.3                    |
|                                                  | Other protozoic GI infections     | 047 (except 047,02)  | 007 (except 007,.10)                  | 007 (except than 007B)   | A07 (except A07.1-A07.3) |
| <b>Viral infections</b>                          | Rotavirus                         | -                    | -                                     | 008L                     | A08.0                    |
|                                                  | Norovirus                         | -                    | -                                     | -                        | A08.1                    |
|                                                  | Adenovirus                        | -                    | -                                     | 008H                     | A08.2                    |
|                                                  | Other viral GI infection          | -                    | 008,8-008,9                           | 008M (except 008L, 008H) | A08 (except A08.0-A08.2) |
| <b>Infectious disease, not otherwise defined</b> | Not defined if viral or bacterial | 048, 571, 764, 785,6 | 008 (except 008,0; 008,2; 008,3), 009 | 008, 008W, 009           | A09                      |

**Supplementary Table 3: Definition of immune-mediated conditions using ICD coding and histopathology**

| <b>Disease</b>                              | <b>ICD7</b>                     | <b>ICD8</b>                          | <b>ICD9</b>  | <b>ICD10</b>                                                                                            |
|---------------------------------------------|---------------------------------|--------------------------------------|--------------|---------------------------------------------------------------------------------------------------------|
| <i>Diabetes</i>                             | 260                             | 250                                  | 250          | E10-14                                                                                                  |
| <i>Psoriasis</i>                            | 706,09                          | 696 (969,30 excluded)                | 696A-C + E-W | L40                                                                                                     |
| <i>SLE</i>                                  | 456,20                          | 734,1                                | 710A         | M32.1; M32.8; M32.9                                                                                     |
| <i>Rheumatoid arthritis</i>                 | 722,00 + 722,01                 | 712,3; 714,93                        | 714          | M05; M06; M08; M09; M12.3                                                                               |
| <i>Thyroiditis</i>                          | 254                             | 245                                  | 245A-X       | E06                                                                                                     |
| <i>Hyperthyroidism</i>                      | 252.00, 252.01, 252.02, 254.00; | 242                                  | 242          | E05                                                                                                     |
| <i>Sarcoidosis</i>                          | 138,00 to 138,04                | 135                                  | 135          | D86                                                                                                     |
| <i>Primary biliary cirrhosis</i>            |                                 |                                      | 571G         | K74.3                                                                                                   |
| <i>ANCA vasculitis and other vasculitis</i> |                                 | 446                                  | 446          | M31                                                                                                     |
| <i>Spondylopathy</i>                        |                                 |                                      |              | M45.9                                                                                                   |
| <i>Autoimmune hepatitis</i>                 |                                 | 573,0x (chronic hepatitis)<br>571,9x | 573D + 573E  | K75.4; K75.5; K75.9 (for exclusion criteria, if AIH had been the outcome we would have used only K75.4) |
| <i>Primary sclerosing cholangitis</i>       |                                 |                                      |              | K83.0A                                                                                                  |
| <i>Celiac disease</i>                       |                                 | Defined according to histopathology  |              |                                                                                                         |

**Supplementary Table 4: Characteristics of cases and their unaffected siblings\***

|                                                | Population controls<br>N=13,699 | Microscopic colitis<br>N=7091 | Collagenous colitis<br>N=2216 | Lymphocytic colitis<br>N=4875 |
|------------------------------------------------|---------------------------------|-------------------------------|-------------------------------|-------------------------------|
| <b>Sex, female</b>                             | 6882 [50.2]                     | 5115 [72.1]                   | 1705 [76.9]                   | 3410 [70.0]                   |
| <b>Age at start of follow up</b>               |                                 |                               |                               |                               |
| Mean [SD] years                                | 54.2 [14.6]                     | 54.1 [15.2]                   | 56.9 [13.1]                   | 52.8 [15.9]                   |
| Median [IQR] years                             | 57.0 [46.0-65.0]                | 57.0 [45.0-65.0]              | 59.0 [50.0-66.0]              | 56.0 [42.0-65.0]              |
| < 50 years                                     | 4370 [31.9]                     | 2317 [32.7]                   | 553 [25.0]                    | 1764 [36.2]                   |
| ≥ 50 years                                     | 9329 [68.1]                     | 4774 [67.3]                   | 1663 [75.1]                   | 3111 [63.8]                   |
| <b>Country of birth</b>                        |                                 |                               |                               |                               |
| Nordic                                         | 13515 [98.7]                    | 7005 [98.8]                   | 2205 [99.5]                   | 4800 [98.5]                   |
| Other                                          | 184 [1.3]                       | 86 [1.2]                      | 11 [0.5]                      | 75 [1.5]                      |
| <b>Years of diagnosis</b>                      |                                 |                               |                               |                               |
| 1990 - 2006                                    | 3890 [28.4]                     | 1951 [27.5]                   | 629 [28.4]                    | 1322 [27.1]                   |
| 2007 - 2011                                    | 4740 [34.6]                     | 2425 [34.2]                   | 751 [33.9]                    | 1674 [34.3]                   |
| 2012 - 2016                                    | 5069 [37.0]                     | 2715 [38.3]                   | 836 [37.7]                    | 1879 [38.5]                   |
| <b>History of gastroenteritis</b>              | 538 [3.9]                       | 543 [7.7]                     | 158 [7.1]                     | 385 [7.9]                     |
| <b>Time from gastroenteritis to index date</b> |                                 |                               |                               |                               |
| Mean [SD] years                                | 17.1 [12.0]                     | 15.4 [12.0]                   | 15.25 [12.3]                  | 15.43 [11.9]                  |
| Median [IQR] years                             | 14.8 [6.3-26.4]                 | 12.3 [4.7-25.4]               | 11.42 [5.4-23.1]              | 12.47 [4.6-25.9]              |
| 0.5 < 1 years                                  | 7 [0.1]                         | 24 [0.3]                      | 8 [0.4]                       | 16 [0.3]                      |
| 1 < 3 years                                    | 48 [0.4]                        | 63 [0.9]                      | 17 [0.8]                      | 46 [0.9]                      |
| 3 < 5 years                                    | 57 [0.4]                        | 51 [0.7]                      | 14 [0.6]                      | 37 [0.8]                      |
| > = 5 years                                    | 426 [3.1]                       | 405 [5.7]                     | 119 [5.4]                     | 286 [5.9]                     |
| <b>Education<sup>¶</sup></b>                   |                                 |                               |                               |                               |
| ≤ 9 years                                      | 3371 [24.6]                     | 1333 [18.8]                   | 495 [22.3]                    | 838 [17.2]                    |
| 10-12 years                                    | 5956 [43.5]                     | 3125 [44.1]                   | 1024 [46.2]                   | 2101 [43.1]                   |
| ≥ 13 years                                     | 4065 [29.7]                     | 2513 [35.4]                   | 674 [30.4]                    | 1839 [37.7]                   |
| Missing                                        | 307 [2.2]                       | 120 [1.7]                     | 23 [1.0]                      | 97 [2.0]                      |

\*Abbreviations: Standard deviation (SD) and Interquartile range (IQR). ¶ Categories based on compulsory school, high school, and college.

**Supplementary Table 5: Association between gastrointestinal infection and risk of MC according to histologic subtypes\***

| Exposures                    | Controls<br>No exposed | CC<br>No. exposed | CC<br>OR, 95% CI   | LC<br>No exposed | LC<br>OR, 95% CI  | P <sub>heterogeneity</sub> |
|------------------------------|------------------------|-------------------|--------------------|------------------|-------------------|----------------------------|
| <b>Any</b>                   | 1920                   | 358               | 3.12 [2.70-3.59]   | 672              | 2.42 [2.19-2.68]  | 0.005                      |
| <b>Bacteria</b>              | 502                    | 94                | 2.84 [2.17-3.70]   | 201              | 2.85 [2.38-3.41]  | 0.992                      |
| <i>Salmonella sp</i>         | 52                     | 5                 | 1.43 [0.47-3.62]   | 13               | 1.66 [0.80-3.18]  | 0.813                      |
| <i>Escherichia sp</i>        | 8                      | 2                 | 8.66 [0.81-189.22] | 4                | 3.01 [0.77-10.60] | 0.450                      |
| <i>Clostridium difficile</i> | 142                    | 47                | 4.07 [2.70-6.12]   | 79               | 4.56 [3.33-6.25]  | 0.664                      |
| <b>Parasites</b>             | 34                     | 6                 | 3.28 [1.10-9.13]   | 12               | 2.14 [0.98-4.35]  | 0.509                      |
| <b>Virus</b>                 | 167                    | 41                | 3.23 [2.10-4.91]   | 49               | 2.19 [1.50-3.13]  | 0.172                      |
| <b>Norovirus</b>             | 40                     | 8                 | 2.66 [1.04-6.36]   | 14               | 2.96 [1.48-5.73]  | 0.849                      |
| <b>Others</b>                | 1327                   | 272               | 3.49 [2.95-4.13]   | 486              | 2.43 [2.16-2.73]  | <0.001                     |

\*Abbreviations: collagenous colitis (CC), confidence interval (CI), lymphocytic colitis (LC), microscopic colitis (MC), number (No.), odds ratio (OR), Models were adjusted for age, sex, county, calendar year, education, and comorbidities according to categories listed in Table 1.

**Supplementary Table 6: Association between gastrointestinal infection and risk of MC according to histologic subtypes using unaffected sibling as comparators\***

| <b>Exposures</b> | <b>Controls<br/>No exposed</b> | <b>CC<br/>No. exposed</b> | <b>CC<br/>OR, 95% CI</b> | <b>LC<br/>No. exposed</b> | <b>LC<br/>OR, 95% CI</b> | <b>P<sub>heterogeneity</sub></b> |
|------------------|--------------------------------|---------------------------|--------------------------|---------------------------|--------------------------|----------------------------------|
| <b>Any</b>       | 538                            | 158                       | 1.79 [1.38-2.33]         | 385                       | 1.81 [1.53-2.15]         | 0.997                            |

|                              |     |     |                   |     |                  |       |
|------------------------------|-----|-----|-------------------|-----|------------------|-------|
| <b>Bacteria</b>              | 138 | 39  | 2.29 [1.38-3.82]  | 102 | 1.63 [1.20-2.22] | 0.904 |
| <i>Salmonella sp</i>         | 15  | 2   | 1.00 [0.16-6.19]  | 7   | 1.36 [0.50-3.74] | 0.854 |
| <i>Escherichia sp</i>        | 5   | 0   | -                 | 2   | 0.81 [0.14-4.78] |       |
| <i>Clostridium difficile</i> | 35  | 15  | 4.57 [1.73-12.11] | 38  | 2.22 [1.29-3.82] | 0.887 |
| <b>Parasites</b>             | 8   | 5   | 1.94 [0.47-8.03]  | 8   | 4.73 [1.09-0.61] | 0.862 |
| <b>Virus</b>                 | 43  | 13  | 2.03 [0.81-5.03]  | 31  | 1.77 [0.98-3.21] | 0.960 |
| <b>Norovirus</b>             | 11  | 2   | 1.92 [0.29-12.92] | 7   | 2.55 [0.73-8.92] | 0.929 |
| <b>Others</b>                | 379 | 121 | 1.73 [1.28-2.33]  | 279 | 1.97 [1.61-2.42] | 0.960 |

\*Abbreviations: collagenous colitis (CC), confidence interval (CI), lymphocytic colitis (LC), microscopic colitis (MC), number (No.), odds ratio (OR), Models were adjusted for age, sex, county, calendar year, education, and comorbidities according to categories listed in Table 1.
